# Supplementary material for: Two types of lanthanide selenidostannates(iv) first prepared under the same solvothermal conditions
Source: Royal Society of Chemistry journal article supplement (doi:10.1039/c4dt03099k), 2014-11-10
Supplement: c4dt03099k1.pdf [file c4dt03099k1.pdf]

## Two types of lanthanide selenidostannates(IV) first prepared under same solvothermal conditions

Jian Zhou, Hong Xiao, Hong-Ping Xiao, Tao Yang, Hua-Hong Zou, Xing Liu, Rong-Qing Zhao, and Qiuling Tang

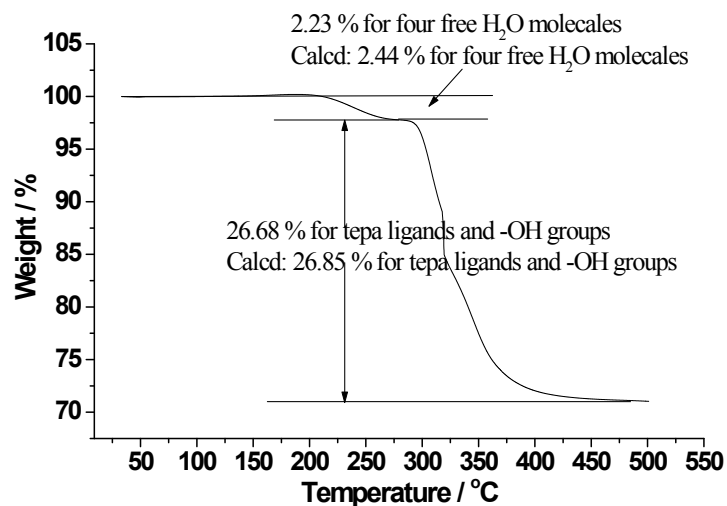

Fig. S1 Thermogravimetric analyse curve of **IIb**.

Ib

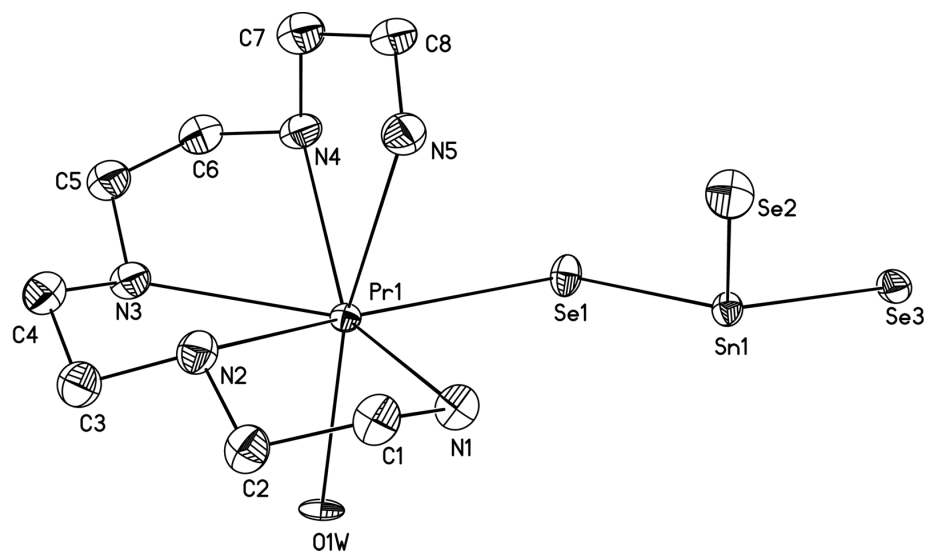

IIa

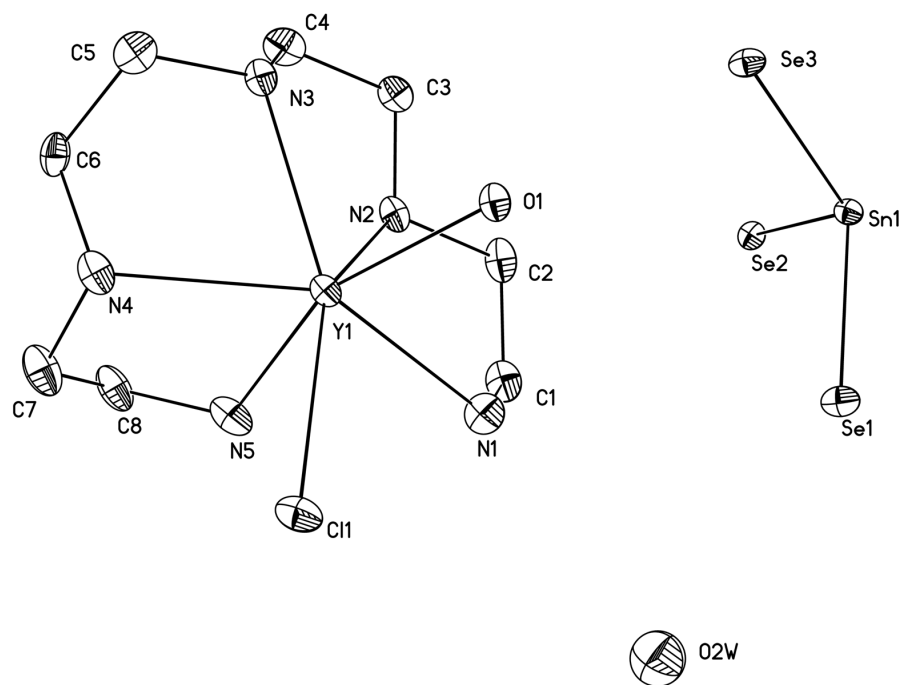

Fig. S2 The asymmetric units of **Ib** and **IIa** (H atoms have been omitted for clarity).
